# Supplementary material
Source: PubMed Central journal article supplement (PMC6546113)

A

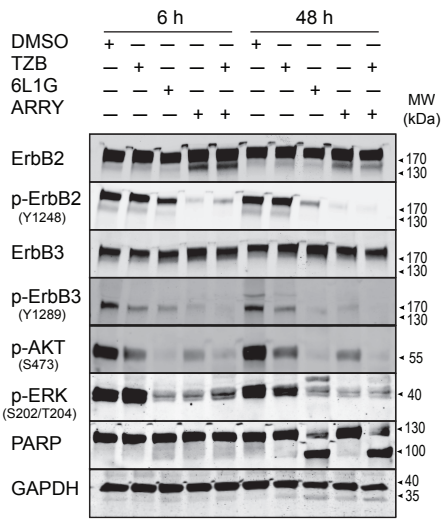

B

95 % CI ■ up ■ n.s. ■ down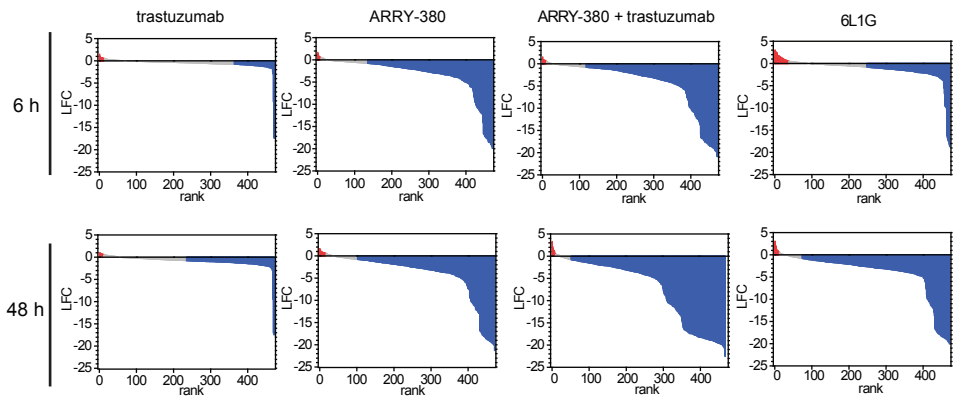

C

| Protein ID | UNIPROT       | Sequence                     |
|------------|---------------|------------------------------|
| ACK1       | Q07912        | kPTyDPVSEDDQPLSSDFK          |
| APLP2      | Q06481        | ylEQmQl                      |
| C1078      | Q9NZ63        | nAEDcLyELPENIR               |
| CK052      | Q96A22        | hVHLENATeYATLR               |
| CSK        | P41240        | vMEGTVAQAQDEFYR              |
| CTND1      | O60716        | hYEDGYPGGSNDyGSLSR           |
| CTND2      | Q9UQB3        | aSYAAGPASNyADPYR             |
| CTND2      | Q9UQB3        | aLQSPHHIDPIyEDR              |
| DDR1       | Q08345        | nLyAGDyYR                    |
| DSC2       | Q02487        | hAQDYVLTNyEGR                |
| DYR1B      | Q9Y463        | iYQyLQSR                     |
| EPH4       | P54760;P54753 | VVIDPFTyEDPNEAVR             |
| EPH4       | P54760        | FLENSSDPTyTSSLGGK            |
| ERBB2      | P04626        | ILDIDETyHADGGkVPIKwMALEsILR  |
| ERBB3      | P21860        | hSLTPTyLSPGLLEEDVNGyVMPDTHLK |
| ERBB3      | P21860        | eGTLSSVGLSSVLGTEEEDEEYEMNMR  |
| ERBB3      | P21860        | dGGGGGGDYAAMGACPASEQyEEMR    |
| FAK1       | Q05397        | ymEDSTyYk                    |
| GNAL       | P38405        | qyELL                        |
| HIPK2      | Q9H2X6        | aVcSTyLQSR                   |
| H590B      | P08238        | eDQTEyLEER                   |
| ICK        | Q9IUP29       | skPPyDyVSTR                  |
| INADL      | Q8NI35        | eQEDLPyHQATR                 |
| K1C19      | P08727        | dYSHyTYTQDLR                 |
| K2C7       | P08729        | ISSARPGGLSSLyGLGASRPR        |
| KPCD       | Q05655        | rSDSASSEPVGyQGFEK            |
| KPCD       | Q05655        | tGVAGEDMQDnSGTyGk            |
| LAP4B      | Q86VI4        | ePPPPyVSA                    |
| LDLR       | P01130        | tTEDEVHicHNQDGySYPSR         |
| LPP        | Q93052        | nDSDPYGQQGHPTWk              |
| PAR3L      | Q8TEW8        | gLLDYATGAIgSVyDMDDDEMDPNyAR  |
| PARD3      | Q8TEW0        | eRdyAEIQDFHR                 |
| PAXI       | P49023        | fiHQQPSSSPyGSSAk             |
| PKHA5      | Q9HAU0        | gGNRPNTGPLYTEADR             |
| PKHA6      | Q9Y2H5        | lPPRESDyADPAAYVMR            |
| PKP4       | Q99569        | tVHDMEQFGQQyDIYER            |
| SG223      | Q86YV5        | eATQPPElyAESTK               |
| SHB        | Q15464        | dKVTIADDySDPFDAk             |
| SHB        | Q15464        | lDycGGSGEPGGVQR              |
| SHB        | Q15464        | aGKGESAGyMEPYEAQR            |
| SHB        | Q15464        | VTIADDySDPFDAk               |
| SHB        | Q15464        | lPQDDDRPADEyDQPWEWNR         |
| SKT        | Q5T5P2        | nVyYELNDVr                   |
| SPIT2      | O43291        | nTyVL                        |
| SRCN1      | Q9C0H9        | nVfyELEDVRDIQDR              |
| SRSF1      | Q07955        | dGyDYDGYR                    |
| SSH2       | Q76176        | tTNPFYntm                    |
| T106B      | Q9NUM4        | nGDVVSQFPyVEFTGR             |
| T106C      | Q9BVX2        | eQEFAIAQFPyVEFTGR            |
| TAB1       | Q15750        | vEPyVDFAEFYR                 |
| TM11L2     | Q6ZVM7        | kTVTyEDPQAVGGGLASALDNR       |
| TYK2       | P29597        | lLAQAEgEPyR                  |
| XYLK       | O75063        | dHVVEGEPyAGYDR               |
| ZDHc5      | Q9C0B5        | ePSPVRyDNLsR                 |

D

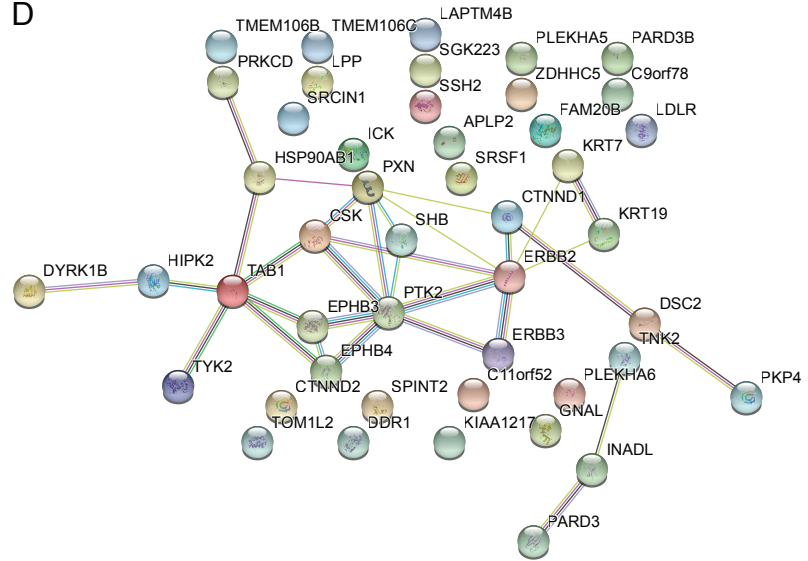

Supplement: NIHMS1027254-supplement-Fig_S1.pdf [file NIHMS1027254-supplement-Fig_S1.pdf]
