# Supplementary material
Source: PubMed Central journal article supplement (PMC6546113)

**A**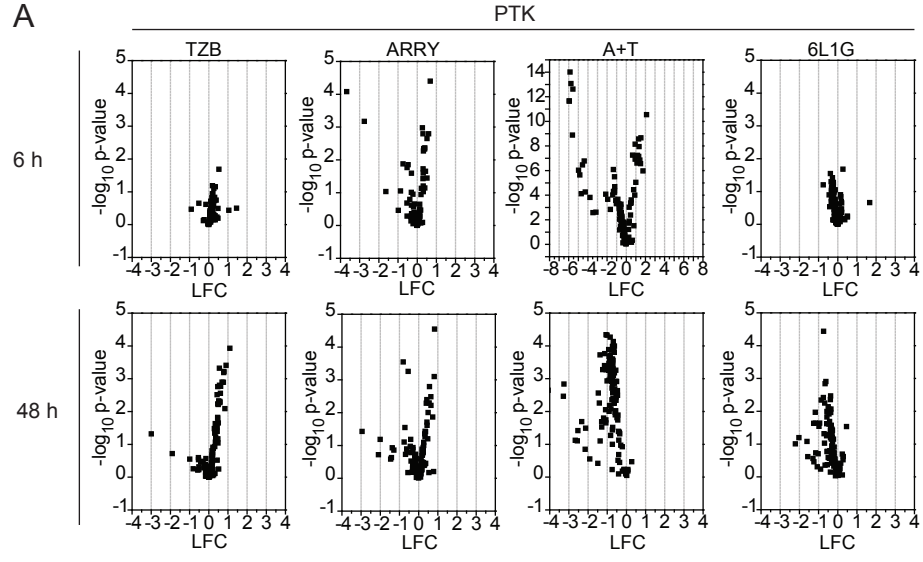**B**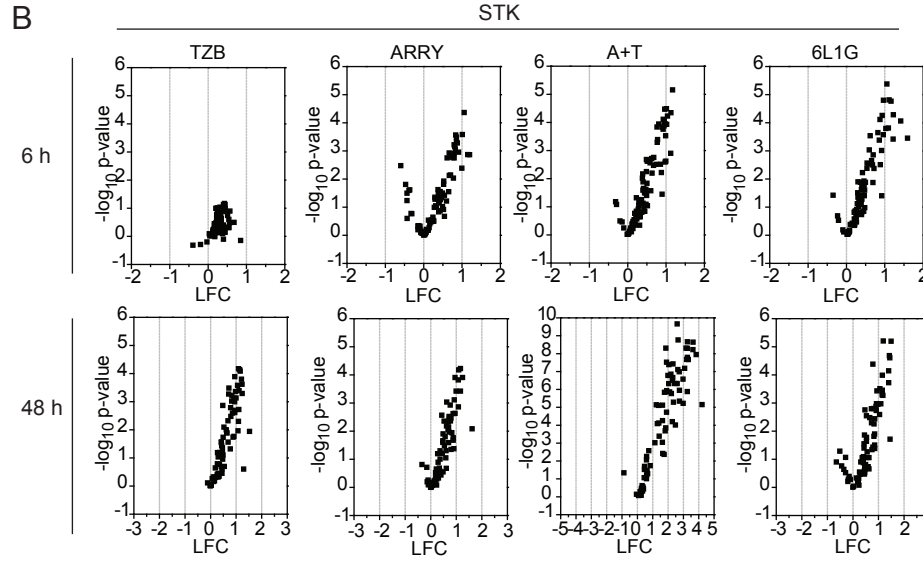**C**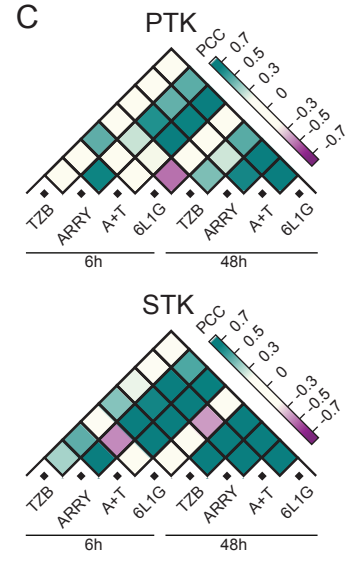**D**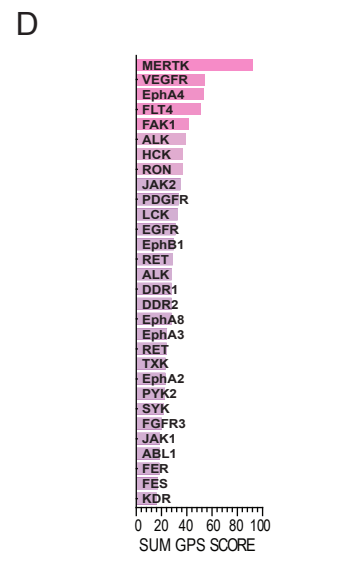**E**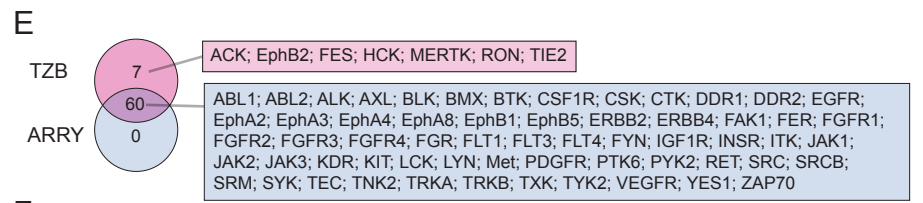**F**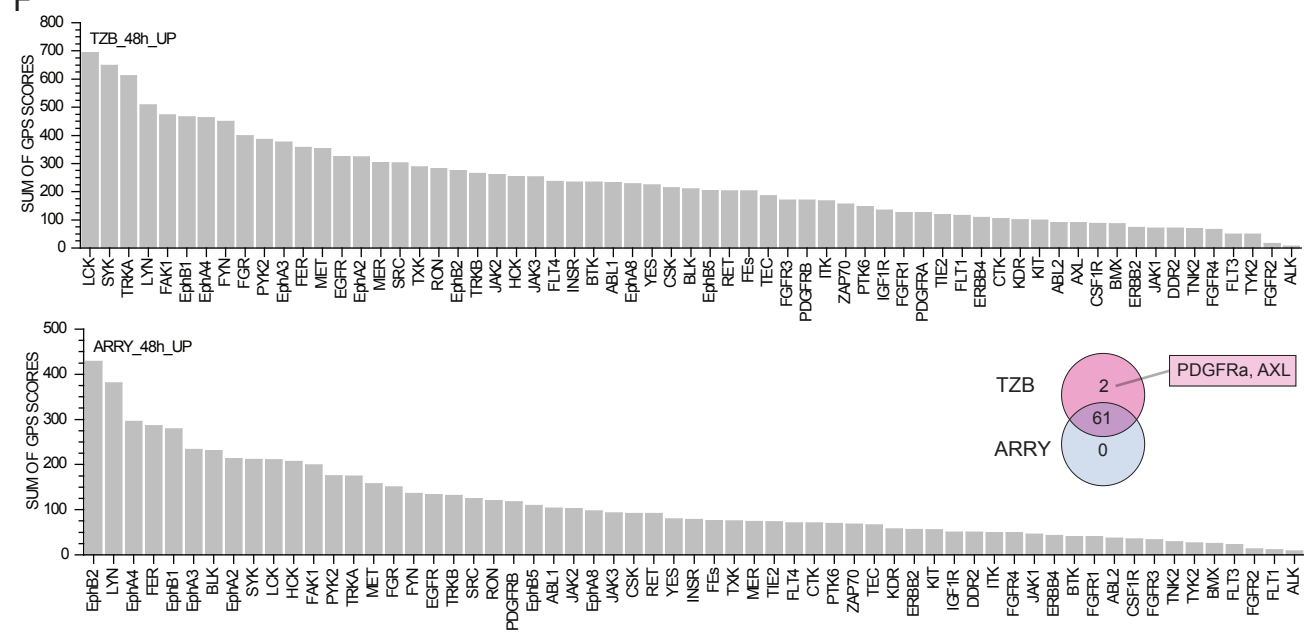

Supplement: NIHMS1027254-supplement-Fig_S2.pdf [file NIHMS1027254-supplement-Fig_S2.pdf]

**A**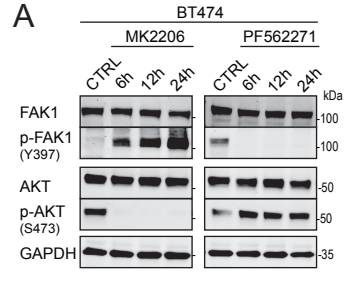**B**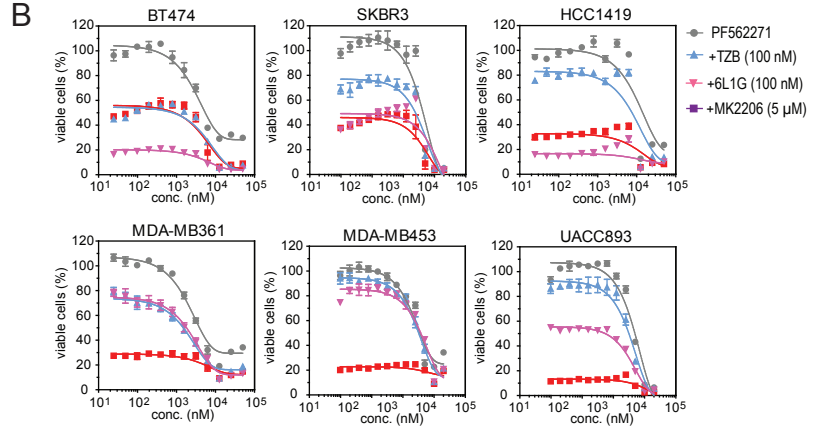**C**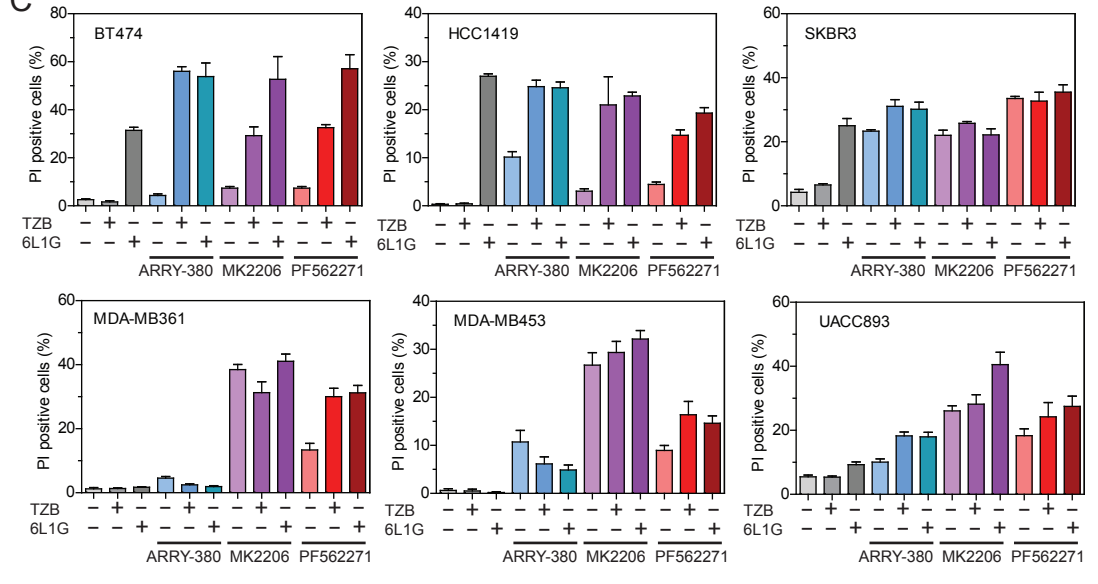

Supplement: NIHMS1027254-supplement-Fig_S3.pdf [file NIHMS1027254-supplement-Fig_S3.pdf]
